# Supplementary material
Source: publisher site journal article supplement (https://www.spandidos-publications.com/804/downloadSupplementary)

Figure S1. Funnel plot for the difference in resistin expression levels between the Kawasaki disease group and healthy control group.

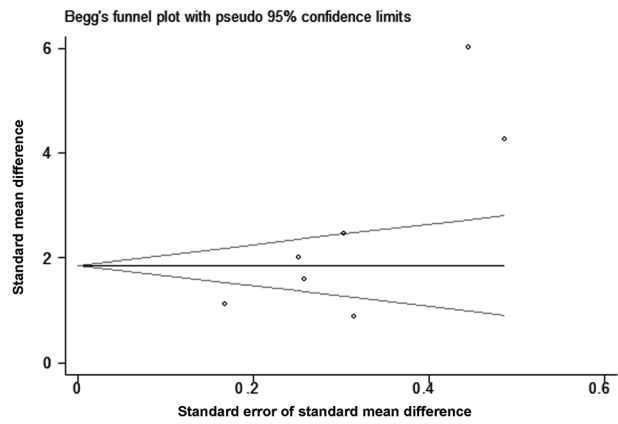

Figure S2. Funnel plot for the difference in resistin expression levels between the Kawasaki disease group and disease control group.

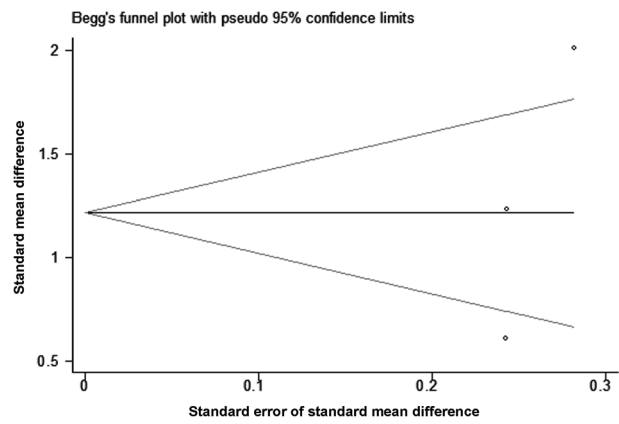

Figure S3. Funnel plot for the difference in adiponectin expression levels between the coronary artery lesions group and non-coronary artery lesions group.

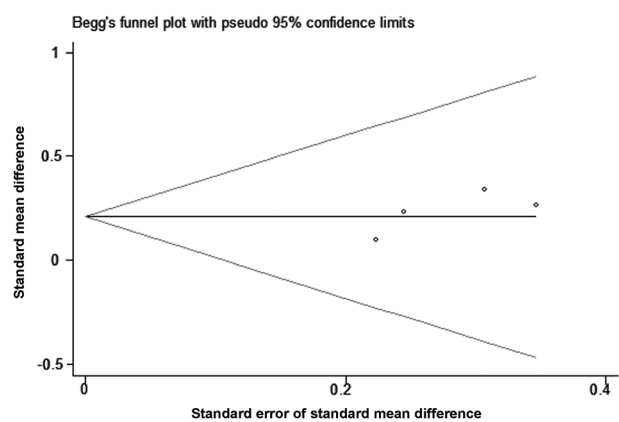

Figure S4. Funnel plot for the difference in resistin expression levels between the coronary artery lesions group and non-coronary artery lesions group.

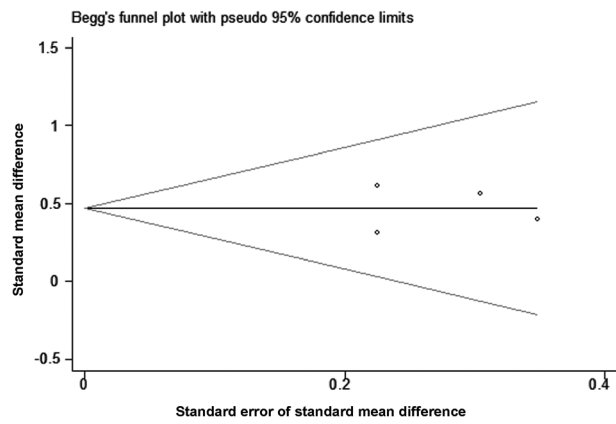

Figure S5. Funnel plot for the difference in adiponectin expression levels between the active group and inactive groups.

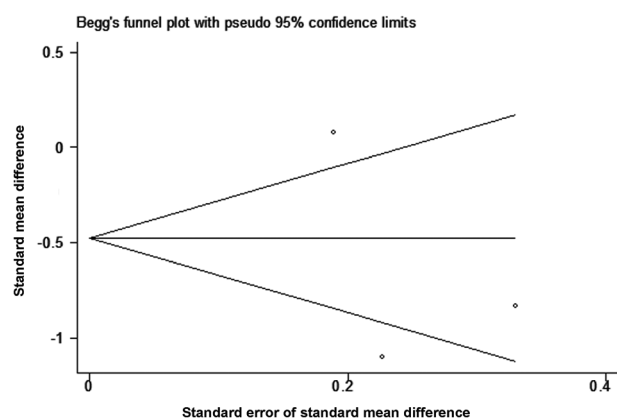

Figure S6. Funnel plot for the difference in resistin expression levels between the active group and inactive groups.

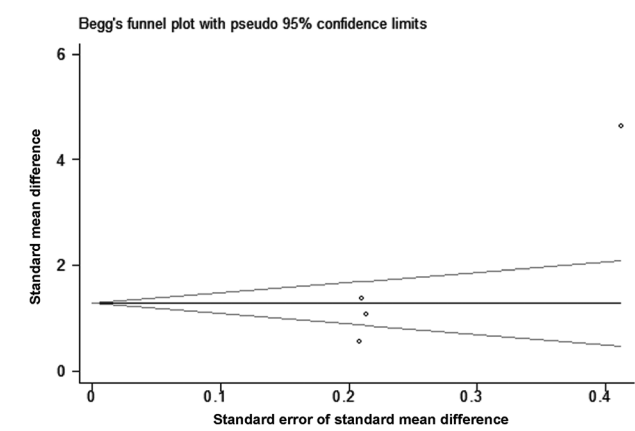

Supplement: Supplementary file 1 [file downloadSupplementary]
